# Supplementary figures and images for: Novel verbal fluency scores and structural brain imaging for prediction of cognitive outcome in mild cognitive impairment
Source: PubMed Central journal article supplement — Alzheimers Dement (Amst). 2016 Feb 15;2:113–22. doi: 10.1016/j.dadm.2016.02.001 (PMC4879664; doi:10.1016/j.dadm.2016.02.001), 2016-02-15

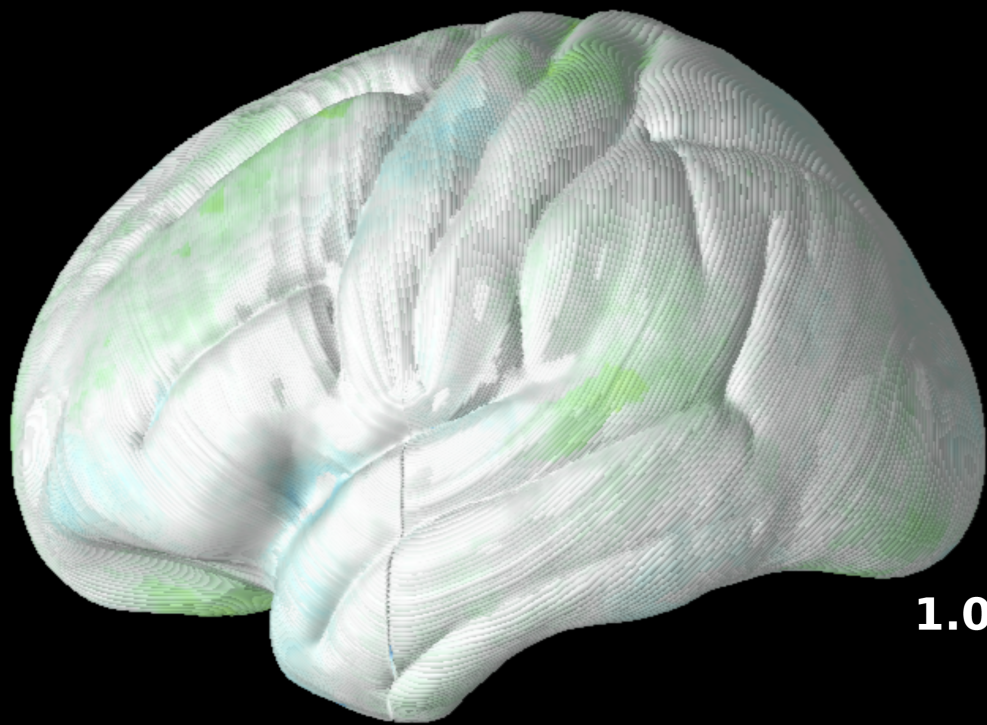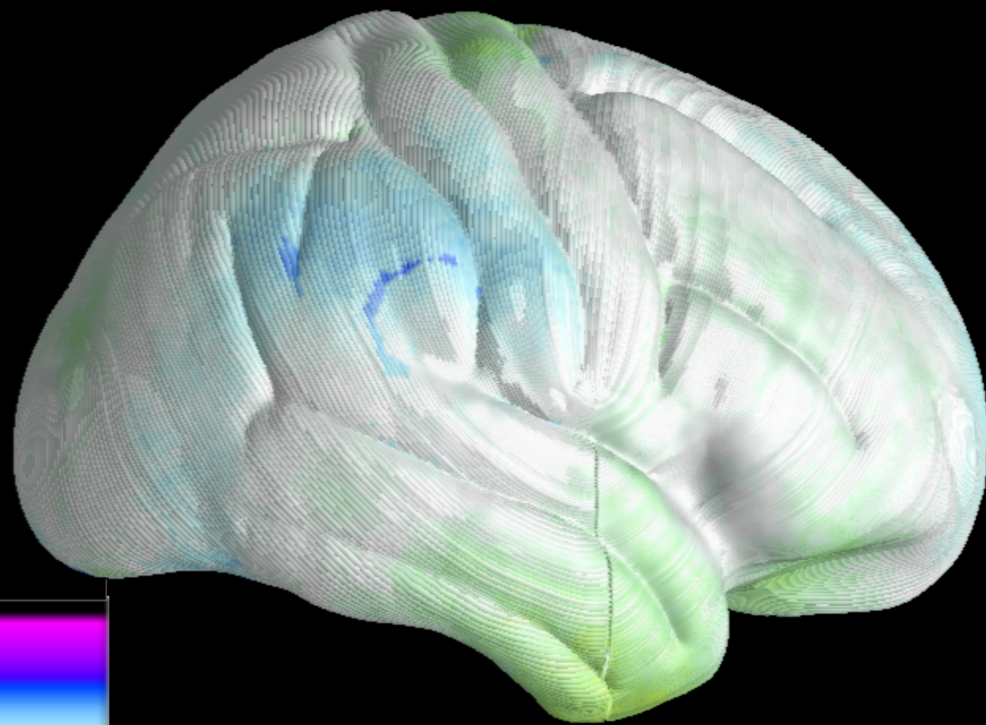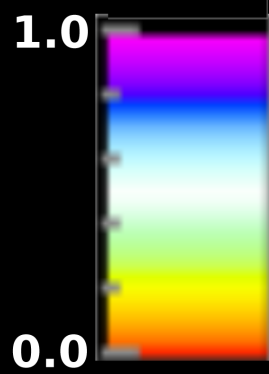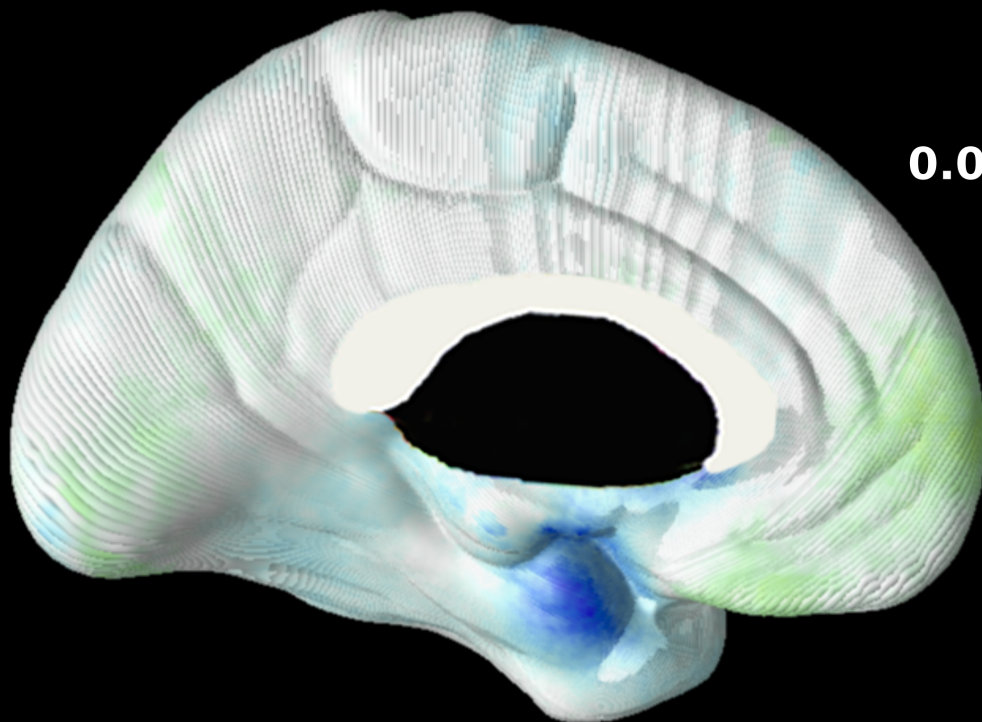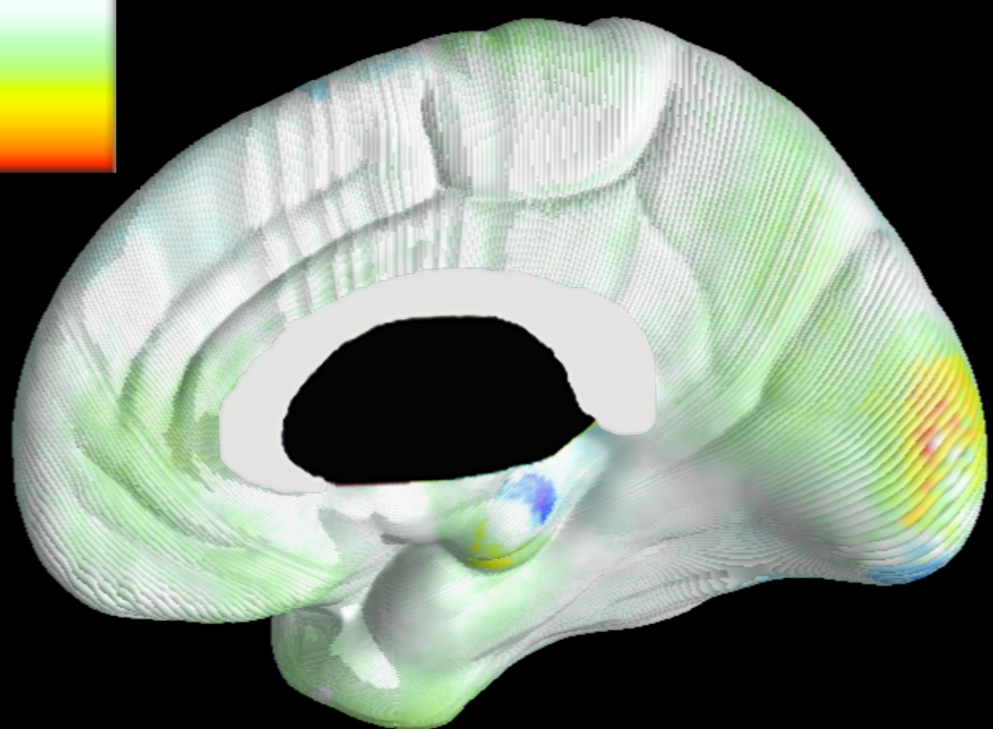

Supplement: mmc2.pdf [file mmc2.pdf]
